# Supplementary material
Source: PubMed Central journal article supplement (PMC4810643)
Supplement: JVI.02936-15_zjv999091439so1.pdf [file JVI.02936-15_zjv999091439so1.pdf]

**Supplemental Information: Section 1: Detailed ORF Coordinates Data for Individual PCR Loci.**

Table S1: Details of Sequenced African Elephant EEHV Gene Coding Regions:

| Virus Name<br>Gene/ORF                                                                                                                                                      | HCMV<br>ORF | HSV<br>ORF | Ori-<br>ent | Protein<br>Name | Position<br>No     | Gene<br>Size | Protein<br>Size        | Genbank<br>Acc# | Status        | Kimba<br>Coordinates | Diff<br>% |
|-----------------------------------------------------------------------------------------------------------------------------------------------------------------------------|-------------|------------|-------------|-----------------|--------------------|--------------|------------------------|-----------------|---------------|----------------------|-----------|
| <u>1. EEHV2 [AfLNg#54]: Sixteen segments, gB, POL, U33, RRA-gO, gH-PAC2, vGPCR1, MCP, TERex3, TERex1,2, EXO-OBP, OBP, POR-HEL, HEL-ORF-M, ORF-M-ORF-O, ORF-K and ORF-L.</u> |             |            |             |                 |                    |              |                        |                 |               |                      |           |
|                                                                                                                                                                             |             |            |             |                 | Total = 29,699     |              | Differences = 8,773-bp |                 | = 29.5%       |                      |           |
| U39                                                                                                                                                                         | UL55        | UL29       | F           | gB              | 00001-01503 (1503) | (501)        | JQ300034               | Core            | 073932-075446 | 26                   |           |
| U38                                                                                                                                                                         | UL54        | UL30       | F           | POL             | 00001-02313 (2313) | (771)        | JQ300035               | Core            | 076511-078856 | 27                   |           |
| U33                                                                                                                                                                         | UL49        | Nil        | F           | Cys-rich        | 00001-00851 (851)  | (284)        | JQ300036               | β/γ             | 083537-084432 | 29                   |           |
| U28                                                                                                                                                                         | UL45        | UL39       | F           | RRA             | 00001-01119 (1119) | (370)        | JQ300037               | Core            | 098645-103256 | 32                   |           |
| U27.5(ORF-H)                                                                                                                                                                | Nil         | UL40       | F           | RRB             | 01138-02043        | 906          | 302                    | α/γ             |               |                      |           |
| U27(ORF-I)                                                                                                                                                                  | Nil         | Nil        | F           | PPF             | 02281-03522        | 1242         | 413                    | Core            |               |                      |           |
| U45.7(ORF-J)                                                                                                                                                                | Nil         | Nil        | F           | -               | 03611-04129        | 518          | 173                    | Novel           |               |                      |           |
| U46                                                                                                                                                                         | UL73        | UL49A      | F           | gN              | 04107-04388        | 282          | 93                     | Core            |               |                      |           |
| U47(ORF-D)                                                                                                                                                                  | UL74        | Nil        | R           | gO              | 04423-04601 (178)  | (59)         |                        | β               |               |                      |           |
| U48                                                                                                                                                                         | UL75        | UL22       | R           | gH              | 00501-00001 (401)  | (194)        | JQ300038               | Core            | 105411-108186 | 28                   |           |
| U48.5(ORF-E)                                                                                                                                                                | Nil         | UL23       | R           | TK              | 01541-00498        | 1043         | 348                    | α/γ             |               |                      |           |
| U49                                                                                                                                                                         | UL76        | UL24       | F           |                 | 01543-02241        | 699          | 232                    | Core            |               |                      |           |
| U50                                                                                                                                                                         | UL77        | UL25       | F           | PAC2            | 02060-02837 (777)  | (292)        |                        | Core            |               |                      |           |
| U51                                                                                                                                                                         | UL78        | Nil        | F           | vGPCR1          | 00001-01049 (1049) | (350)        | KC854747               | β               | 109202-110242 | 31                   |           |
| U57                                                                                                                                                                         | UL86        | UL19       | R           | MCP             | 02767-00001 (2767) | (922)        | JQ300039               | Core            | 115578-118288 | 23                   |           |
| U60ex3                                                                                                                                                                      | UL89ex2     | UL15ex2    | R           | TERex3          | 00576-00001 (576)  | (192)        | JQ300040               | Core            | 123609-124421 | 25                   |           |
| U62                                                                                                                                                                         | UL91        | Nil        | F           |                 | 00598-00816 (220)  | (73)         |                        | β/γ             |               |                      |           |
| -                                                                                                                                                                           |             |            |             |                 | 00001-00061 (61)   | -            | JQ300041               | -               | 127304-128190 | 22                   |           |
| U66ex2                                                                                                                                                                      | Nil         | Nil        | R           | TERex2          | 00174-00022 (149)  | (50)         |                        | -               |               |                      |           |
| U66ex1                                                                                                                                                                      | UL89ex1     | UL15ex1    | R           | TERex1          | 00915-00277 (639)  | (213)        |                        | -               |               |                      |           |
| U70                                                                                                                                                                         | UL98        | UL12       | F           | EXO             | 00001-01036 (1036) | (345)        | JQ300042               | Core            | 131988-134629 | 27                   |           |
| U71                                                                                                                                                                         | UL99        | UL11       | F           | myrTeg          | 00973-01281        | 309          | 102                    | Core            |               |                      |           |
| U72                                                                                                                                                                         | UL100       | UL10       | R           | gM              | 02318-01389        | 930          | 309                    | Core            |               |                      |           |
| U73(ORF-G)                                                                                                                                                                  | Nil         | UL09       | F           | OBP             | 02353-02684 (332)  | (111)        |                        | α/β2            |               |                      |           |
| U73(ORF-G)                                                                                                                                                                  | Nil         | UL09       | F           | OBP             | 00001-00570 (570)  | (190)        | JQ300043               | α/β2            | 134851-135420 | 22                   |           |
| U76                                                                                                                                                                         | UL104       | UL06       | R           | POR             | 01290-00001 (1290) | (430)        | JQ300044               | Core            | 140006-141866 | 21                   |           |
| U77                                                                                                                                                                         | UL105       | UL05       | F           | HEL             | 01244-01863 (620)  | (207)        |                        | Core            |               |                      |           |
| U77                                                                                                                                                                         | UL105       | UL05       | F           | HEL             | 00001-00039 (39)   | (13)         | KC854730               | Core            | 143627-144721 | 26                   |           |
| U77.5(ORF-M)                                                                                                                                                                | Nil         | Nil        | F           | Nuclear         | 00356-01082 (726)  | (232)        |                        | Novel           |               |                      |           |
| U77.5(ORF-M)                                                                                                                                                                | Nil         | Nil        | F           | Nuclear         | 00001-00536 (536)  | (178)        | KC854731               | Novel           | 144958-147958 | 36                   |           |
| U80.5(ORF-N)                                                                                                                                                                | Nil         | Nil        | R           | vCXCL?          | 00964-00641        | 323          | 107                    | Novel           |               |                      |           |
| U81                                                                                                                                                                         | UL114       | UL02       | R           | UDG             | 01941-00991        | 950          | 316                    | Core            |               |                      |           |
| U82                                                                                                                                                                         | UL115       | UL01       | R           | gL              | 02746-01907        | 840          | 280                    | Core            |               |                      |           |
| U82.5(ORF-O)                                                                                                                                                                | Nil         | Nil        | R           | S/TGlyP         | 02928-02670 (258)  | (86)         |                        | Novel           |               |                      |           |
| U85.5(ORF-Kex3)                                                                                                                                                             | Nil         | Nil        | R           | SplGlyP         | 01940-00001 (1940) | (647)        | JX011086               | Novel           | 152011-154339 | 38                   |           |
| U85.5(ORF-Kex2)                                                                                                                                                             | Nil         | Nil        | R           | SplGlyP         | 02066-02028 (39)   | (13)         |                        | Novel           |               |                      |           |
| U85.5(ORF-Kex1)                                                                                                                                                             | Nil         | Nil        | R           | SplGlyP         | 02181-02134 (48)   | (16)         |                        | Novel           |               |                      |           |
| -                                                                                                                                                                           |             |            |             |                 | 00001-00012 (12)   | -            |                        | -               |               |                      |           |
| U86.5(ORF-L)                                                                                                                                                                | Nil         | Nil        | R           | IE-like         | 00748-00013 (735)  | (245)        | KC854732               | Novel           | 155029-155769 | 22                   |           |

2. EEHV3A [AflNg47]: Six segments, POL, TERex3, EXO-gM, OBP, HEL & UDG.

Total = 3,707-bp Differences = 1,370-bp = 37%

|            |         |         |   |        |                   |       |          |      |               |    |
|------------|---------|---------|---|--------|-------------------|-------|----------|------|---------------|----|
| U38        | UL54    | UL30    | F | POL    | 00001-00996 (996) | (332) | JQ300045 | Core | 077783-078775 | 23 |
| U60ex3     | UL89ex2 | UL13ex2 | R | TERex3 | 00311-00001 (311) | (104) | JQ300046 | Core | 123750-124060 | 21 |
| U70        | UL98    | UL12    | F | EXO    | 00001-00042 (42)  | (14)  | JQ300047 | Core | 132976-133485 | 52 |
| U71        | UL99    | UL11    | F | myrTeg | 00001-00296 (296) | (99)  |          | Core |               |    |
| U72        | UL100   | UL10    | R | gM     | 00650-00453 (207) | (69)  |          | Core |               |    |
| U73(ORF-G) | Nil     | UL09    | F | OBP    | 00001-00697 (697) | (232) | JQ300048 | α/β2 | 134673-135249 | 46 |
| U77        | UL105   | UL05    | F | HEL    | 00001-00576 (576) | (192) | JQ300049 | Core | 141286-141861 | 30 |
| U81        | UL114   | UL02    | R | UDG    | 00377-00001 (377) | (126) | KT832517 | Core | 146543-145168 | 32 |

3. EEHV3A [AflNg54]: Seven segments, POL, TK, TERex3, EXO-gM, OBP, HEL & UDG.

Total = 4,019-bp Differences = 1,513-bp = 38%

|              |         |         |   |        |                    |       |          |      |               |    |
|--------------|---------|---------|---|--------|--------------------|-------|----------|------|---------------|----|
| U38          | UL54    | UL30    | F | POL    | 00001-01001 (1001) | (334) | JQ300050 | Core | 077783-078790 | 23 |
| U48.5(ORF-E) | Nil     | UL23    | R | TK     | 00425-00001 (425)  | (142) | KT832514 | α/γ  | 106300-106718 | 38 |
| U60ex3       | UL89ex2 | UL15ex2 | R | TERex3 | 00309-00001 (309)  | (103) | JQ300051 | Core | 123751-124057 | 21 |
| U70          | UL98    | UL12    | F | Exo    | 00001-00047 (47)   | (14)  | JQ300052 | Core | 132971-133573 | 50 |
| U71          | UL99    | UL11    | F | myrTeg | 00001-00301 (301)  | (100) |          | Core |               |    |
| U72          | UL100   | UL10    | R | gM     | 00749-00465 (284)  | (93)  |          | Core |               |    |
| U73(ORF-G)   | Nil     | UL09    | F | OBP    | 00001-00525 (525)  | (172) | JQ300053 | α/β2 | 134842-135249 | 48 |
| U77          | UL105   | UL05    | F | HEL    | 00001-00560 (560)  | (187) | JQ300054 | Core | 141285-141844 | 31 |
| U81          | UL114   | UL02    | R | UDG    | 00450-00001 (450)  | (150) | KT832515 | Core | 146586-146138 | 32 |

4. EEHV6 [NAP42, nodule-D\*]: Fifteen segments, gB-POL, U33, RRA, RRB-gO, gH-PAC2, vGPCR, MCP, TERex3, TERex1,2, EXO-OBP, POR-HEL, HEL-ORF-O, ORF-Kex3(N), ORF-Kex3(C) & ORF-L.

Total = 31,532 Differences = 5,267-bp = 16.7%

|              |      |       |   |        |                    |       |          |       |               |    |
|--------------|------|-------|---|--------|--------------------|-------|----------|-------|---------------|----|
| U39          | UL55 | UL29  | F | gB     | 00001-02541 2541   | 836   | JF692766 | Core  | 073959-078890 | 17 |
| U38          | UL54 | UL30  | F | POL    | 02563-04906 (2344) | (781) |          | Core  |               |    |
| U33          | UL49 | Nil   | F | Cys-R  | 00001-00916 (916)  | (305) | JQ300055 | β/γ   | 083537-084442 | 21 |
| U28          | UL45 | UL39  | F | RRA    | 00001-00880 (880)  | (293) | JQ300056 | Core  | 098630-099507 | 17 |
| U27.5(ORF-H) | Nil  | UL40  | F | RRB    | 00001-00398 (398)  | (133) | JQ300057 | α/γ   | 101128-103703 | 17 |
| U27(ORF-I)   | Nil  | Nil   | F | PPF    | 00640-01848 1209   | 302   |          | Core  |               |    |
| U45.7(ORF-J) | Nil  | Nil   | F | -      | 01921-02418 498    | 165   |          | Novel |               |    |
| U46          | UL73 | UL49A | F | gN     | 02402-02692 291    | 96    |          | Core  |               |    |
| U47(ORF-D)   | UL74 | Nil   | R | gO     | 03342-02714 (628)  | (209) |          | β     |               |    |
| U48          | UL75 | UL22  | R | gH     | 00544-00001 (544)  | (181) | JQ300058 | Core  | 105359-108081 | 21 |
| U48.5(ORF-E) | Nil  | UL23  | R | TK     | 01559-00477 1083   | 360   |          | α/γ   |               |    |
| U49          | UL76 | UL24  | F | -      | 01558-02256 699    | 232   |          | Core  |               |    |
| U50          | UL77 | UL25  | F | PAC2   | 02075-02684 (610)  | (203) |          | Core  |               |    |
| U51          | UL78 | Nil   | F | vGPCR1 | 00001-00831 (831)  | (277) | JQ300059 | β     | 109380-110219 | 22 |
| U57          | UL86 | UL19  | R | MCP    | 02252-00001 (2252) | (751) | JQ300060 | Core  | 115567-117818 | 17 |

|                 |         |         |   |            |                   |        |          |          |               |               |
|-----------------|---------|---------|---|------------|-------------------|--------|----------|----------|---------------|---------------|
| U60ex3          | UL89ex2 | UL15ex2 | R | TERex3     | 00558-00001 (558) | (146)  | JQ300061 | Core     | 123626-124493 | 14            |
| U62             | UL91    | Nil     | F | -          | 00592-00858       | 277    | 92       | β/γ      |               |               |
| U63             | UL92    | Nil     | F | -          | 00806-00875       | (20)   | (7)      | β/γ      |               |               |
| -               | -       | -       | - | -          | 00001-00033       | (33)   | -        | JQ300062 | -             | 127311-128195 |
| U66ex2          | Nil     | Nil     | R | TERex2     | 00025-00156       | 120    | 30       | -        |               |               |
| U66ex1          | UL89ex1 | UL15ex1 | R | TERex1     | 00238-00881       | (644)  | (215)    | -        |               |               |
| U70             | UL98    | UL12    | F | EXO        | 00001-00267       | (264)  | (88)     | JQ300063 | Core          | 132751-135415 |
| U71             | UL99    | UL11    | F | myrTeg.    | 00204-00506       | 303    | 101      | Core     |               |               |
| U72             | UL100   | UL10    | R | gM         | 01546-00578       | 969    | 323      | Core     |               |               |
| U73(ORF-G)      | Nil     | UL09    | F | OBP        | 01545-02662       | (1018) | (339)    | α/β2     |               |               |
| U76             | UL104   | UL06    | R | POR        | 01313-00001       | (1313) | (438)    | JQ300064 | Core          | 139965-141870 |
| U77             | UL105   | UL05    | F | HEL        | 01312-01888       | (576)  | (192)    | Core     |               |               |
| U77             | UL105   | UL05    | F | HEL        | 00001-00021       | (21)   | (6)      | KC854734 | Core          | 143646-147773 |
| U77.5(ORF-M)    | Nil     | Nil     | F | Nuclear    | 00327-01826       | 1500   | 499      | Novel    |               |               |
| U80.5(ORF-N)    | Nil     | Nil     | R | vCXCL1?    | 02253-01957       | 297    | 98       | Novel    |               |               |
| U81             | UL114   | UL02    | R | UDG        | 03304-02351       | 954    | 317      | Core     |               |               |
| U82             | UL115   | UL01    | R | gL         | 04088-03270       | (819)  | (272)    | Core     |               |               |
| U82.5(ORF-O)    | Nil     | Nil     | R | S/TGlyP    | 04088-04018       | (71)   | (23)     | Novel    |               |               |
| U85.5(ORF-Kex3) | Nil     | Nil     | R | SplGlyP(C) | 00719-00001       | (719)  | (240)    | KC854736 | Novel         | 152584-153346 |
| U85.5(ORF-Kex3) | Nil     | Nil     | R | SplGlyP(N) | 00656-00001       | (656)  | (219)    | KC854737 | Novel         | 153520-154205 |
| U86.5(ORF-L)    | Nil     | Nil     | R | IE-like    | 03262-00001       | (3262) | (1087)   | JX011087 | Novel         | 155435-158615 |

**5a. EEHV3Av1 [NAP42, nodule B]: Three segments, POL, TERex3, EXO-U71-gM and HEL.**

Total = 2,902-bp Differences = 1,076-bp = 37%

|        |         |         |   |         |             |        |       |          |      |               |    |
|--------|---------|---------|---|---------|-------------|--------|-------|----------|------|---------------|----|
| U38    | UL54    | UL30    | F | POL     | 00001-01284 | (1284) | (428) | JQ300065 | Core | 077760-079041 | 34 |
| U60ex3 | UL89ex2 | UL15ex2 | R | TERex3  | 00287-00001 | (287)  | (76)  | JQ300066 | Core | 123759-124046 | 21 |
| U70    | UL98    | UL12    | F | EXO     | 00001-00023 | (23)   | (8)   | JQ300067 | Core | 132976-133580 | 51 |
| U71    | UL99    | UL11    | F | myrTeg. | 00001-00277 | (277)  | (92)  | Core     |      |               |    |
| U72    | UL100   | UL10    | R | gM      | 00731-00440 | (291)  | (97)  | Core     |      |               |    |
| U77    | UL104   | UL05    | F | HEL     | 00001-00598 | (598)  | (199) | JQ300068 | Core | 141275-141872 | 30 |

**5b. EEHV3Av1 [NAP42, nodule-D]: Four segments POL, EXO-U71-gM, OBP and HEL.**

Total = 3,061-bp Differences = 1,224-bp = 40%

|            |       |      |   |         |             |        |       |          |      |               |    |
|------------|-------|------|---|---------|-------------|--------|-------|----------|------|---------------|----|
| U38        | UL54  | UL30 | F | POL     | 00001-01025 | (1025) | (342) | JQ300073 | Core | 077760-078781 | 34 |
| U70        | UL98  | UL12 | F | EXO     | 00001-00023 | (23)   | (8)   | JQ300074 | Core | 132976-133580 | 51 |
| U71        | UL99  | UL11 | F | myrTeg. | 00001-00277 | (278)  | (92)  | Core     |      |               |    |
| U72        | UL100 | UL10 | R | gM      | 00731-00440 | (291)  | (97)  | Core     |      |               |    |
| U73(ORF-G) | Nil   | UL09 | F | OBP     | 00001-00707 | (707)  | (236) | JQ300076 | α/β2 | 134852-135440 | 44 |
| U77        | UL104 | UL05 | F | HEL     | 00001-00598 | (598)  | (199) | JQ300078 | Core | 141275-141872 | 30 |

**5c. EEHV3Av1 [NAP42, nodule-A]: One segment, TERex3. Total = 287-bp**

|        |         |         |   |        |             |       |      |          |      |               |    |
|--------|---------|---------|---|--------|-------------|-------|------|----------|------|---------------|----|
| U60ex3 | UL89ex2 | UL15ex2 | F | TERex3 | 00001-00287 | (287) | (96) | JQ300079 | Core | 123759-124046 | 21 |
|--------|---------|---------|---|--------|-------------|-------|------|----------|------|---------------|----|

**5d. EEHV3Av1 [NAP42, lung sample-E]: One segment, POL. Total = 233-bp**

|     |      |      |   |     |             |       |      |          |      |               |    |
|-----|------|------|---|-----|-------------|-------|------|----------|------|---------------|----|
| U38 | UL54 | UL30 | F | POL | 00001-00233 | (233) | (78) | JQ300080 | Core | 078536-078768 | 33 |
|-----|------|------|---|-----|-------------|-------|------|----------|------|---------------|----|

5e. EEHV3Av3 [NAP42, lung sample-H]: One segment, POL. Total = 234-bp

|     |      |      |   |     |                   |      |          |      |               |    |
|-----|------|------|---|-----|-------------------|------|----------|------|---------------|----|
| U38 | UL54 | UL30 | F | POL | 00001-00234 (234) | (78) | JQ300081 | Core | 078549-078782 | 34 |
|-----|------|------|---|-----|-------------------|------|----------|------|---------------|----|

6a. EEHV3Av2 [NAP42, nodule-C]: Three segments, POL, TERex3, EXO-U71-gM and HEL.

Total = 1,994-bp    Differences = 768-bp    = 39%

|        |         |         |   |         |                   |       |          |      |               |    |
|--------|---------|---------|---|---------|-------------------|-------|----------|------|---------------|----|
| U38    | UL54    | UL30    | F | POL     | 00001-00382 (382) | (127) | JQ300069 | Core | 078404-078782 | 37 |
| U60ex3 | UL89ex2 | UL15ex2 | R | TERex3  | 00287-00001 (287) | (76)  | JQ300070 | Core | 123759-124026 | 21 |
| U70    | UL98    | UL12    | F | EXO     | 00001-00023 (23)  | (8)   | JQ300071 | Core | 132976-133577 | 52 |
| U71    | UL99    | UL11    | F | myrTeg. | 00001-00277 (277) | (92)  |          | Core |               |    |
| U72    | UL100   | UL10    | R | gM      | 00727-00439 (286) | (95)  |          | Core |               |    |
| U77    | UL104   | UL05    | F | HEL     | 00001-00598 (598) | (213) | JQ300072 | Core | 141275-141872 | 30 |

6b. EEHV3Av2 [NAP42, nodule-D]: Four segments POL, EXO-U71-gM, OBP and HEL.

Total = 2,572-bp    Differences = 983-bp    = 38%

|            |       |      |   |         |                    |       |          |      |               |    |
|------------|-------|------|---|---------|--------------------|-------|----------|------|---------------|----|
| U38        | UL54  | UL30 | F | POL     | 00001-01025 (1025) | (342) | JQ300073 | Core | 077760-078781 | 34 |
| U70        | UL98  | UL12 | F | EXO     | 00001-00024 (23)   | (8)   | JQ300075 | Core | 132976-133577 | 51 |
| U71        | UL99  | UL11 | F | myrTeg. | 00001-00277 (277)  | (92)  |          | Core |               |    |
| U72        | UL100 | UL10 | R | gM      | 00727-00439 (287)  | (95)  |          | Core |               |    |
| U73(ORF-G) | Nil   | UL09 | F | OBP     | 00001-00222 (222)  | (74)  | JQ300077 | α/β2 | 134853-135076 | 31 |
| U77        | UL104 | UL05 | F | HEL     | 00001-00598 (598)  | (199) | JQ300078 | Core | 141275-141872 | 30 |

7a. EEHV7 [NAP42, nodule-D]: Seven segments, POL, TK, TERex3, U71-gM, OBP, POR-HEL and UDG.

Total = 4,008-bp    Differences = 1,495-bp    = 37%

|              |         |         |   |        |                   |       |          |      |               |    |
|--------------|---------|---------|---|--------|-------------------|-------|----------|------|---------------|----|
| U38          | UL54    | UL30    | F | POL    | 00001-00660 (660) | (220) | JQ300083 | Core | 078384-079040 | 34 |
| U48.5(ORF-E) | Nil     | UL23    | R | TK     | 00420-00001 (420) | (140) | KT832516 | α/δ  | 106271-106687 | 38 |
| U60ex3       | UL89ex2 | UL15ex2 | F | TERex3 | 00330-00001 (330) | (110) | KC854738 | Core | 123728-124058 | 22 |
| U71          | UL99    | UL11    | F | MyrTeg | 00001-00270 (270) | (90)  | JX011088 | Core | 132826-133524 | 54 |
| U72          | UL100   | UL10    | R | gM     | 00698-00463 (235) | (78)  |          | Core |               |    |
| U73(ORF-G)   | Nil     | UL09    | F | OBP    | 00001-00623 (623) | (207) | KC854739 | α/β2 | 134672-135230 | 42 |
| U76          | UL104   | UL06    | R | POR    | 00341-00001 (341) | (113) | JQ300084 | Core | 140955-141878 | 29 |
| U77          | UL105   | UL05    | F | HEL    | 00292-00924 (632) | (211) |          | Core |               |    |
| U81          | UL114   | UL02    | R | UDG    | 00353-00001 (353) | (118) | KU321582 | Core | 146123-146476 | 35 |

7b. EEHV7 [NAP42, nodule-B]: One segment, POL. Total = 340-bp

|     |      |      |   |     |                   |       |          |      |               |    |
|-----|------|------|---|-----|-------------------|-------|----------|------|---------------|----|
| U38 | UL54 | UL30 | F | POL | 00001-00342 (342) | (114) | JQ300082 | Core | 078413-078751 | 35 |
|-----|------|------|---|-----|-------------------|-------|----------|------|---------------|----|

8a. EEHV2v1 [NAP42, nodule-B]: One segment, POL. Total = 449-bp

|     |      |      |   |     |                   |       |          |      |               |    |
|-----|------|------|---|-----|-------------------|-------|----------|------|---------------|----|
| U38 | UL54 | UL30 | F | POL | 00001-00449 (449) | (150) | JQ300085 | Core | 078393-078841 | 31 |
|-----|------|------|---|-----|-------------------|-------|----------|------|---------------|----|

8b. EEHV2v1 [NAP42, nodule-D]: One segment, POL. Total = 464-bp

|     |      |      |   |     |                   |       |          |      |               |    |
|-----|------|------|---|-----|-------------------|-------|----------|------|---------------|----|
| U38 | UL54 | UL30 | F | POL | 00001-00476 (476) | (159) | JQ300086 | Core | 078383-078858 | 31 |
|-----|------|------|---|-----|-------------------|-------|----------|------|---------------|----|

8c. EEHV2v1 [NAP42, lung tissue sample-H]: One segment, POL. Total = 419-bp

|     |      |      |   |     |                   |       |          |      |               |    |
|-----|------|------|---|-----|-------------------|-------|----------|------|---------------|----|
| U38 | UL54 | UL30 | F | POL | 00001-00419 (419) | (140) | JQ300087 | Core | 078414-078832 | 32 |
|-----|------|------|---|-----|-------------------|-------|----------|------|---------------|----|

8d. EEHV2v2 [NAP42, lung tissue sample-H]: One segment, POL. Total = 419-bp

|     |      |      |   |     |                   |       |          |      |               |    |
|-----|------|------|---|-----|-------------------|-------|----------|------|---------------|----|
| U38 | UL54 | UL30 | F | POL | 00001-00419 (419) | (140) | JQ300088 | Core | 078414-078832 | 32 |
|-----|------|------|---|-----|-------------------|-------|----------|------|---------------|----|

9. EEHV2 [SAM7, lung tissue #2]: One segment, OBP. Total = 581-bp

|            |     |      |   |     |                   |       |          |      |               |    |
|------------|-----|------|---|-----|-------------------|-------|----------|------|---------------|----|
| U73(ORF-G) | Nil | UL09 | F | OBP | 00001-00581 (581) | (197) | KT832496 | α/β2 | 134844-135424 | 22 |
|------------|-----|------|---|-----|-------------------|-------|----------|------|---------------|----|

10a. EEHV3A [SAM6, lung tissue #1]: Seven segments, POL, TK, TERex3, U71/gM, OBP, HEL & UDG.

Total = 3,965-bp Differences = 1416-bp 36%

|            |         |         |   |        |                   |       |          |      |               |    |
|------------|---------|---------|---|--------|-------------------|-------|----------|------|---------------|----|
| U38        | UL54    | UL30    | F | POL    | 00001-00389 (389) | (130) | KT832497 | Core | 078391-078784 | 36 |
| U48.5      | Nil     | UL23    | R | TK     | 00406-00001 (406) | (135) | KU147226 | αγ   | 106300-106759 | 41 |
| U60ex3     | UL89ex2 | UL15ex2 | R | TERex3 | 00301-00001 (301) | (100) | KT832498 | Core | 123758-124059 | 21 |
| U71        | UL99    | UL11    | F | MyrTeg | 00001-00238 (238) | (78)  | KT832499 | Core | 132902-133562 | 53 |
| U72        | UL100   | UL10    | R | gM     | 00666-00405 (249) | (82)  |          | Core |               |    |
| U73(ORF-G) | Nil     | UL09    | F | OBP    | 00001-00891 (891) | (297) | KT832500 | α/β2 | 134658-135440 | 42 |
| U76        | UL104   | UL06    | R | POR    | 00377-00001 (377) | (125) | KT832501 | Core | 140919-141870 | 30 |
| U77        | UL105   | UL05    | F | HEL    | 00376-00952 (576) | (192) |          | Core |               |    |
| U81        | UL114   | UL02    | F | UDG    | 00001-00360 (360) | (120) | KU147227 | Core | 145115-146475 | 34 |

10b. EEHV3A [SAM7, lung tissue #2]: Four segments, POL, TERex3, U71/gM & HEL.

Total = 1,657-bp Differences = 616-bp = 37%

|        |         |         |   |        |                   |       |          |      |               |    |
|--------|---------|---------|---|--------|-------------------|-------|----------|------|---------------|----|
| U38    | UL54    | UL30    | F | POL    | 00001-00389 (389) | (130) | KT832502 | Core | 078400-078785 | 35 |
| U60ex3 | UL89ex2 | UL15ex2 | R | TERex2 | 00315-00001 (315) | (105) | KT832503 | Core | 123744-124059 | 21 |
| U71    | UL99    | UL11    | F | MyrTeg | 00001-00167 (167) | (55)  | KT832504 | Core | 132940-133475 | 55 |
| U72    | UL100   | UL10    | R | gM     | 00512-00324 (188) | (62)  |          | Core |               |    |
| U77    | UL105   | UL05    | F | HEL    | 00441-00001 (441) | (147) | KT832505 | Core | 141312-141756 | 30 |

11a. EEHV6 [SAM6, lung tissue #1]: Four segments, POL, TERex3, OBP & HEL.

Total = 2,227-bp Differences = 323-bp = 14.5%

|            |         |         |   |     |                   |       |          |      |               |    |
|------------|---------|---------|---|-----|-------------------|-------|----------|------|---------------|----|
| U38        | UL54    | UL30    | F | POL | 00001-00468 (468) | (156) | KT832506 | Core | 078389-078856 | 20 |
| U60ex3     | UL89ex2 | UL15ex2 | R | TER | 00347-00001 (347) | (116) | KT832507 | Core | 123679-124024 | 12 |
| U73(ORF-G) | Nil     | UL09    | F | OBP | 00001-00469 (469) | (156) | KT832508 | α/β2 | 134868-135335 | 16 |
| U76        | UL104   | UL06    | R | POR | 00377-00001 (377) | (125) | KT832509 | Core | 140919-141861 | 12 |
| U77        | UL105   | UL05    | F | HEL | 00376-00943 (567) | (189) |          | Core |               |    |

11b. EEHV6 [SAM7, lung tissue #2]: Three segments, TERex3, OBP, HEL.

Total = 1,186-bp Differences = 163-bp = 13.7%

|        |         |         |   |        |                   |      |          |      |               |    |
|--------|---------|---------|---|--------|-------------------|------|----------|------|---------------|----|
| U60ex3 | UL89ex2 | UL15ex2 | R | TERex3 | 00237-00001 (237) | (79) | KT832510 | Core | 123738-123973 | 11 |
|--------|---------|---------|---|--------|-------------------|------|----------|------|---------------|----|

|                                                                                                       |         |         |   |        |                   |       |          |                  |                                                      |    |
|-------------------------------------------------------------------------------------------------------|---------|---------|---|--------|-------------------|-------|----------|------------------|------------------------------------------------------|----|
| U73                                                                                                   | Nil     | UL09    | F | OBP    | 00001-00458 (458) | (153) | KT832511 | $\alpha/\beta 2$ | 134871-135328                                        | 16 |
| U77                                                                                                   | UL105   | UL06    | F | HEL    | 00491-00001 (491) | (164) | KT832512 | Core             | 141318-141808                                        | 13 |
| <u>12. EEHV7 [SAM7, lung tissue #2]: One segment, HEL.</u>                                            |         |         |   |        |                   |       |          |                  | <u>Total = 575-bp.</u>                               |    |
| U77                                                                                                   | UL105   | UL05    | F | HEL    | 00001-00581 (581) | (194) | KT832513 | Core             | 141300-141880                                        | 28 |
| <u>13. EEHV2 [EP26, spleen tissue]: Two segments, TK &amp; POL.</u>                                   |         |         |   |        |                   |       |          |                  | <u>Total = 1,398-bp. Differences = 373-bp = 27%</u>  |    |
| U38                                                                                                   | UL54    | UL30    | F | POL    | 00001-00489 (489) | (163) | KM282198 | Core             | 078384-078872                                        | 28 |
| U48.5/ORF-E                                                                                           | Nil     | UL23    | R | TK     | 00738-00001 (738) | (246) | KM282199 | $\alpha/\gamma$  | 106186-107079                                        | 26 |
| U49                                                                                                   | UL76    | UL24    | F |        | 00740-00909 (169) | (56)  |          | Core             |                                                      |    |
| <u>14. EEHV3A [EP26, spleen tissue]: Three segments, POL, TERex3, OBP.</u>                            |         |         |   |        |                   |       |          |                  | <u>Total = 1,121-bp. Differences = 426-bp = 38%</u>  |    |
| U38                                                                                                   | UL54    | UL30    | F | POL    | 00001-00408 (408) | (136) | KM282200 | Core             | 078390-078794                                        | 37 |
| U60ex3                                                                                                | UL89ex2 | UL15ex2 | R | TERex3 | 00319-00001 (319) | (106) | KM282201 | Core             | 123738-124056                                        | 22 |
| U73(ORF-G)                                                                                            | Nil     | UL09    | F | OBP    | 00001-00394 (394) | (131) | KM282202 | $\alpha/\beta 2$ | 134994-135361                                        | 52 |
| <u>15. EEHV6 [EP26, spleen tissue]: One segment, HEL. Total = 574-bp</u>                              |         |         |   |        |                   |       |          |                  |                                                      |    |
| U77                                                                                                   | UL105   | UL05    | F | HEL    | 00001-00574 (574) | (191) | KM282203 | Core             | 141307-141880                                        | 13 |
| <u>16. EEHV3A [NAP27, Hansa, colon tissue]: One segment, UDG Total = 366-bp. Differences = 148-bp</u> |         |         |   |        |                   |       |          |                  |                                                      |    |
| U81                                                                                                   | UL      | UL02    | R | UDG    | 00366-00001 (366) | (122) | KT832474 | Core             | 146108-146567                                        | 32 |
| <u>17a. EEHV3B [NAP62, whole blood]. Seven segments, POL, TK, TERex3, U71-gM, OBP, HEL &amp; UDG.</u> |         |         |   |        |                   |       |          |                  | <u>Total = 3,088-bp. Differences = 1192-bp = 39%</u> |    |
| U38                                                                                                   | UL54    | UL30    | F | POL    | 00001-00365 (365) | (122) | KT832467 | Core             | 078390-078749                                        | 36 |
| U48.5(ORF-E)                                                                                          | Nil     | UL23    | R | TK     | 00315-00001 (315) | (105) | KT832468 | $\alpha/\gamma$  | 106389-106702                                        | 55 |
| U60ex3                                                                                                | UL89ex2 | UL15ex2 | R | TERex3 | 00323-00001 (323) | (108) | KT832469 | Core             | 123737-124059                                        | 23 |
| U71                                                                                                   | UL99    | UL11    | F | MyrTeg | 00001-00272 (272) | (91)  | KT832470 | Core             | 132857-133516                                        | 52 |
| U72                                                                                                   | UL100   | UL10    | R | gM     | 00674-00454 (221) | (77)  |          | Core             |                                                      |    |
| U73(ORF-G)                                                                                            | Nil     | UL09    | F | OBP    | 00001-00472 (472) | (154) | KT832471 | $\alpha/\beta 2$ | 134656-135121                                        | 35 |
| U77                                                                                                   | UL104   | UL05    | F | HEL    | 00001-00572 (572) | (191) | KT832472 | Core             | 141265-141836                                        | 30 |
| U81                                                                                                   | UL114   | UL02    | R | UDG    | 00367-00001 (367) | (122) | KT832473 | Core             | 146108-146474                                        | 35 |
| <u>17b. EEHV3B [NAP62, saliva]. Two segments, U71-gM &amp; OBP.</u>                                   |         |         |   |        |                   |       |          |                  | <u>Total = 962-bp. Differences = 450-bp = 47%</u>    |    |
| U71                                                                                                   | UL99    | UL11    | F | MyrTeg | 00001-00167 (167) | (55)  | KT832475 | Core             | 132850-133577                                        | 53 |
| U72                                                                                                   | UL100   | UL10    | R | gM     | 00631-00349 (282) | (93)  |          | Core             |                                                      |    |
| U73(ORF-G)                                                                                            | Nil     | UL09    | F | OBP    | 00001-00331 (331) | (110) | KT832476 | $\alpha/\beta 2$ | 134650-134980                                        | 35 |

18. EEHV3B [SAM5, skin nodules]. Five segments, POL, TERex3, U71-gM, OBP & HEL

Total = 2,835-bp Differences = 1078-bp = 38%

|            |         |         |   |        |                   |       |          |                |               |    |
|------------|---------|---------|---|--------|-------------------|-------|----------|----------------|---------------|----|
| U38        | UL54    | UL30    | F | POL    | 00001-00405 (405) | (135) | KT832491 | Core           | 078392-078793 | 36 |
| U60ex3     | UL89ex2 | UL15ex2 | R | TERex3 | 00280-00001 (280) | (93)  | KT832492 | Core           | 123758-124037 | 20 |
| U71        | UL99    | UL11    | F | MyrTeg | 00001-00106 (106) | (35)  | KT832493 | Core           | 132863-133523 | 54 |
| U72        | UL100   | UL10    | R | gM     | 00567-00339 (228) | (76)  |          | Core           |               |    |
| U73(ORF-G) | Nil     | UL09    | F | OBP    | 00001-00727 (727) | (242) | KT832494 | $\alpha/\beta$ | 134627-135240 | 43 |
| U76        | UL103   | UL06    | R | POR    | 00376-00001 (376) | (125) | KT832495 | Core           | 140919-141779 | 30 |
| U77        | UL104   | UL05    | F | HEL    | 00377-00856 (479) | (156) |          | Core           |               |    |

(\*) Identical EEHV6 sequence results were obtained at many of these same genomic loci from nodules -B and -C as well as at several loci from nodule-A (data not shown).

( ) = Incomplete ORF or exon only.

The status column refers to whether the gene is common to all mammalian herpesvirus sub-families = Core or just to the designated subset of other herpesvirus sub-families;  $\alpha/\beta$  = Alpha & Beta only;  $\beta/\gamma$  = Beta & Gamma only;  $\beta$  = Beta only;  $\alpha/\beta 2$  = Alpha & *Roseolovirus* genus only; or unique to the *Proboscivirus* genus = Novel.

The %Diff column shows nucleotide divergence values relative to the matching EEHV1(Kimba)locus.



## **Supplemental Information: S2. Listing of PCR Primers Used at Selected PCR Loci:**

Diagnostic two-round redundant PCR primers for the PAN EEHV U38(POL) Codehops region (LGH6710/6711/6712) as well as more sensitive three-round primer sets specific for the EEHV1, EEHV2, EEHV3, EEHV4, EEHV5 and EEHV6 versions of the 520-bp POL and 340-bp TER loci have all been described elsewhere(1-3). Similarly, standard basic consensus primer sets for the EEHV1, EEHV2, EEHV5 and EEHV6 versions of the 679-bp U71-72(gM) and 986-bp U76(POR)-U77(HEL) loci, as well as EEHV1 specific sets for the 910-bp U51(vGPCR1) and 1080-bp U74.5(TK)-U48(gH) loci, were all listed in Stanton et al (4) or in Zachariah et al (5). A second generation high efficiency U60(TERex3) primer set specific for detection of EEHV3 (LGH6707-6708-6727-6728) was also described previously (2). An additional 24 sets of consensus or specific primers (not listed here) for several selected EEHV1A, EEHV1B, EEHV2, EEHV5 and EEHV6 loci were also given in the previous two papers (6, 7). Eleven more of the most relevant selected PCR amplification primer sets used for this paper are listed below.

### 1. EEHV6 Specific U39(gB) (2300-bp):

- R1 LGH3830 5'-CCCTGGTTTTAAAGACTGATAA-3' [1A, 1B, 2 com]
- R2 LGH3828 5'-TGGCCTTATCGTATATGTTCTGG-3' [1A, 1B, 2, 5, 6 com]
- R3 LGH7931 5'-GGACTACCAGAGGCTACAGGAAC-3' [6 only]
- L4 LGH7905 5'-GTTCTGTAGCCTCTGGTAGTC-3' [6 only]
- R4 LGH7930 5'-CCATGTCAATACATCCTATGGAAAGC-3' [6 only]
- L3 LGH7904 5'-GATGCTTTCCATAGGATGTATTGAC-3' [6 only]
- R5 LGH7933 5'-GGTGACTTAAACGTGGCACAGGTTTCAG-3' [6 only]
- R6 LGH7932 5'-GAGTATAGCGGATGCGTGGTGTTCG-3' [6 only]
- L2 LGH7932B 5'-CGACACCACGCATCCGCTATACTC-3' [6 only]

L1 LGH7998B 5'-GGACTTCCACGAGATTGATTCATTC-3' [1B, 6 com]

Set A: First round 1A R1-L3 = 980-bp; second round 2A1 R2-L3 = 790-bp; second round 2A2 = 850-bp; R1-L4; third round 3AB R2-L4 = 650-bp. Set B: First round 1B R3-L2 = 640-bp; second round 2B R4-L2 = 420-bp. Set C: First round 1C; R5-L1 = 930-bp; second round 2C R6-L1 = 860-bp.

2. EEHV6 Specific U38(POL) Codehops plus N-terminal Extended Primers [1,350-bp];

R1 LGH7804B 5'-GCATTTGATATAGAATGTCT[A/T]TCGGG-3' [6 only]

R2 LGH3818B 5'-ACGCA[T/G]CACTTGTTTACATTAGG-3' [1/6 com]

R3 LGH7805B 5'-GGGCATGGAGTCGTTTTTTAACAGATGTC-3' [6 only]

L2 LGH7821B 5'-GAGACCTTATCCATGCACACACGGTAC-3' [6 only]

R4 LGH7828B 5'-TTGACGGACAACARAGCAGAAT-3' [1/6 Com]

R5 LGH7831 5'-GCATTATACAGGCATACAACCTGTG-3' [6 only]

L1 LGH7584B 5'-CATCGATTTTGAAGTTCTCATGGTC-3' [6 only]

First round PCR 1A R3-L1 = 990-bp; second round 2A R4/L1 = 660-bp; third round 3A R5-L1 = 475-bp; and extended first round PCR 1B R1-L1 = 1,350-bp, second round 2B R1-L2 = 450-bp; third round 3B R2-L2 = 340-bp;.

3. Initial Consensus EEHV3, EEHV4, EEHV7 U38(POL) Internal Codehops Effective Primers:

R1 LGH6719 5'-CGTTGAAGGTGTCGCAGAT-3'

L2 LGH6720 5'-ATCCTGGCGCAGCTGCTGAC-3'

L1 LGH7400 5'-CAGCATCATCCAGGCCTACAAC-3'

First round PCR R1-L1 = 330-bp, second round R1-L2 = 220-bp.

4. EEHV3 versus EEHV7 Specific U38(POL) Primers (for sequencing of mixtures only):

R1' LGH6719B3 5'-GCAGATGTAGCTCTTGGTCCTG-3'

R1'' LGH6719B7 5'-GCAGATGTAGCTCTTGGTCCTA-3'

L2'' LGH6720B3 5'-TGGCTGGCCGAGAGGAAGGCCGTC-3

L2' LGH6720B7 5'-TGGCTGGCCGAGAGGAAGGCCGTT-3'

5. Effective Primers for EEHV2 and EEHV7 U38(POL) N-terminal Codehops Extension.

R1 LGH7832 5'-CAAYTCTATNCCYTTTCATNCT-3' [2 and 7]

R2 LGH7833 5'-CCCACGTANCGYTTYTTRCA-3' [2, 6, 7]

L2 LGH7437 5'-GTATCATCAAGCTTATAACC-3' [2 and 7]

L1 LGH7440 5'-GACTTCGCCAGCTTGTATCC-3' [2 and 7]

First round 1A PCR R1-L1 = 670-bp; second round 2A R1-L2 = 640-bp; second round 2B R1-L2 = 630-bp.

6. EEHV7-Specific and GC-rich EEHV Common U38(POL) Primers:

R1 LGH7906B 5'-GCTTCACGAAGACCTTGTCTACC-3' [EEHV7 > 3]

R2 LGH7907 5'-CGAAGACCTTGTCYACCTCCAGC-3' [EEHV7 = 3]

R3 LGH7908 5'-ACGAARACGCTGTCCGTGTCCCCGTA-3' [EEHV7 > 2, 3]

R4 LGH7887B 5'-CGACGTCTACCTGGAAGTTGTCCT-3' [EEHV7 specific]

L2 LGH7925 5'-GCCGTTTCGGGAGAACTCAAGGT-3' [EEHV7 specific]

L1 LGH7924 5'-CTTCGTCAAGGCCACGTACGCACC-3' [EEHV7 > 4]

First round 1A PCR R1-L1 = 520-bp; second round 2A R2-L1 = 510-bp; second round 2B R1-L2 = 450-bp; third round 3A R3-L1 = 470-bp; third round 3B R2-L2 = 440-bp; alternative third round 3C R4-L1 = 320-bp; alternative third round 3D R3-L2 = 300-bp.

7. EEHV7-Specific and GC-rich EEHV Common U48.5(TK) Primers:

R1 LGH9985 5'-CTG TTC CTC TGT CTC ACG CGC CTC AGC GT-3' [EEHV3,4,7 com]

R2 LGH9986 5'-AGC ATG GAG TAC AAC CCG ATG TAG CTG AA-3' [EEHV3,4,7 com]

L7-alt2 LGH11129 5'-GCG ACA CCG TTC CTG GCC AGG GAG GCC-3' [EEHV7-specific]

L7-alt1 LGH11128 5'-CGC TAT ACG ACG AGC CCA TGC TTC-3' [EEHV7-specific]

L2 LGH9987 5'-GTA TAG GTG TAG GTA AGA CGT CAC TGT TC-3' [EEHV3,4,7 com]

L1 LGH9988 5'-CTC ACC GTT TAC CTA GAA GGT TGT ATA GGT G-3' [EEHV3,4,7 com]

First round R1-R4 = 485-bp, second round 2A R1-L2 = 460-bp, second round 2B R2-L1 = 395-bp, third round 3AB R2-L2 = 365-bp. Alternative first round 1A R1-L2 = 460-bp, second round 2 R1-L7-alt1 = 400-bp, third round 3 R1-L7-alt2 = 270-bp.

8. EEHV1 and EEHV6 Specific plus EEHV1,2,5,6 Consensus U57(MCP) Primers:

R1 LGH7980 5'-CARGGCTTTTCTACCATATCTGACG-3' [Common]

R2 LGH8406 5'-GGGAACACCTTRAA[A/C]AGGTCYTGTAACG-3' [Common]

L6 LGH7978 5'-AGCACRGTGGACATGGGCATGGG-3' [Common]

R3 LGH7979 5'-GCGCTGTAACCCATGCCCATGTCCAC-3' [Common]

- R4 LGH8526 5'-CYCTGATGTA[A/C]GGRGCGCATGCYTG-3' [Common]
- R5 LGH8525 5'-CYGGCATGCAGTGTCTCTGAGCTTG-3' [EEHV2, 5]
- L5 LGH7977 5'-GAGAACGCCAGAGT[G/T]CTAGAGATCAC-3' [Common]
- R6 LGH8524 5'-G[C/G]TCGAGCAGCC[G/T]TCTYAACATTAC'3' [EEHV1, 6]
- L4 LGH7976 5'-GAT[A/C]TAYTACTAYTGCATGCTYCC-3' [Common]
- R7 LGH8522 5'-TCGAGRTTTGATACGTCATARTTCT-3' [EEHV1, 2]
- L3 LGH8523 5'-CGGAATTAAAGAACCCGTCTGG-3' [EEHV1, 6]
- L2 LGH8518 5'-CAYCC[G/T]ATGTACGAYTTCAGTGACGTA-3' [EEHV1, 2, 5]
- L1 LGH8517 5'-CAGGACAGATCCAC[C/G]AT[A/C]TCCGTGCA-3' [EEHV1, 2]

Appropriate pairs of primers were chosen from those listed above in order from right to left across this overall 2.7-kb locus located between EEHV1A(Kimba) coordinates 115564 to 118391.

9. EEHV7-Specific U60(TERex3) Primers:

- R1 LGH9380 5'-CGTGCAACACGAGCACGCAAAGTACGTC-3' [EEHV7 only]
- R2 LGH9379 B 5'-CGCCRACCCAGATCCTGAATGTCATCTC-3' [EEHV3, 4, 7 com]
- R3 LGH9378 5'-CGTGTGCGAGGAGCACTTATATAGCTTCGG-3' [EEHV3, 4, 7 >2, 5, 6 com]
- L2 LGH9377 5'-CGAACTCCGTGAYGCTGGCGTCCGTCAGGA-3' [EEHV3, 4, 7 com]
- L1 LGH9376 5'-GAGTTGACGGTGCTGTAGCGGATCATGTGCG-3' [EEHV3, 7 com]

First round PCR R1-L1 = 330-bp; second round A R1-L2 = 300-bp; second round B R2-L1 = 280-bp; third round A R3-L1 = 250-bp; alternative third round B R2-L2 = 250-bp.

10. EEHV7-Specific plus GC-rich EEHV common U71(MyrTeg)-U72(gM) Primers [750-bp block]:

- R1 LGH6793B 5'-CATCGGGA[G/T]CCGGAAAAACGCC-3' [EEHV2, 4-specific]  
R2 LGH9213 5'-GCGTGGGAGGCGCGAGGAGGCCGTGCTG-3' [EEHV7 only]  
R3 LGH9237 5'-CGGGATTGAAAGGCAAGGACGGCAACCC-3' [EEHV7 only]  
L4 LGH9212B 5'-TCRCCATCGTGCGTTGCCTC[A/C]GGATGTTA-3' [EEHV7, 3 > 4]  
L3 LGH9211 5'-GGCAACATCACCGTAATGTACGTGGTTTGG-3' [EEHV7 only]  
L2 LGH9210 5'-CCAGTACGATAAGATCTACCTGGACGA-3' [EEHV3, 4 com]  
L1 LGH6792B 5'-GCATCTTCTTCACCCTCAAGC-3' [EEHV4-specific]

First round PCR R1-L3 = 700-bp; second round R1-L4 = 670-bp; third round R2-L4 = 610-bp. Alternative first round R2-L1 = 680-bp; second round R2-L2 = 650-bp; third round R3-L2 = 600-bp.

11. EEHV7-Specific U73(OBP) Primers [625-bp block]:

- R1 LGH9280 5'-GAC[C/G]GCGGCYATGATCTCGTGGCTCA-3' [EEHV3, 4, 7 com]  
R2 LGH9374 5'-TCTCATCGTGCAGATCGAGAGTCTCTACC-3' [EEHV7 only]  
R3 LGH9375 5'-CCGACTCGAGGGTTCCTACGACGTGTC-3' [EEHV7 only]  
L3 LGH9283 5'-GGCACGAGGCGACGCACGCCAGGAACTTG-3' [EEHV3, 4 com]  
R4 LGH9394 5'-CCTGCTGCT[C/G]ATGGACGCCACCRCTAAC-3' [EEHV7 > 3]  
L2 LGH9285 5'-GTTGTCCGGGAACCGTTCCTGATCTCCTCC-3' [EEHV4 specific]  
L1 LGH9286 5'-GGTTCCTGATCTC[C/G]TCCACGA[C/T]GAAGCAC-3' [EEHV3, 4 com]

LHS segment: First round PCR R2-L1 = 440-bp; second round A R3-L1 = 420-bp; second round B R3-L2 = 400-bp; third round A R4-L1 = 270-bp; third round B R4-L2 = 240-bp. RHS segment: First round PCR R1-L1 = 880-bp; second round R1-L2 = 840-bp; third round R1-L3 = 390-bp.

12. EEHV7-Specific and GC-rich EEHV common U76(POR)-U77(HEL) Primers [850-bp block]:

R1-7 LGH9267 5'-CAGTACTTGATGATGTGCGTCATATCCG-3' [EEHV3, 4, 7 common]

R2-7 LGH7920R 5'-CATG TTCAGGTAGTGCACGGAGAGC-3' [EEHV7 > 4 = 3]

R3-7 LGH7921 5'-CTGAACATGTGTTCCGGCCAGCAAGG-3' [common for all EEHVs]

L4-7 LGH7922B 5'-CAGCAGCATRGAGACGTGGCGAC-3' [EEHV3, 4, 7 common]

L3-7 LGH9246 5'-ACGATGATGTTGTGGCGGCAGATGGGCA-3' [EEHV3, 4, 7 common]

L2-7 LGH8749B 5'-CACGGCGTG[C/G]AGCATGTGCTCCAGG-3' [EEHV3, 4, 7 common]

L1-7 LGH3198 5'-CACAG[A/C]GCGTTGTAGAACC-3' [common for all EEHVs]

First round PCR 1A R1-L2 = 910-bp, second round 2A R1-L3 = 860-bp, third round 3A R1-L4 = 710-bp. Alternative first round PCR 1B R2-L1 = 870-bp; second round 2B R2-L3 = 800-bp; third round 3B R3-L3 = 520-bp. Alternative third round (both sets) 3C R3-L4 = 360-bp.

13. EEHV7-Specific and GC-rich EEHV Common U81(UDG) Primers:

R1 LGH9989 5'-AGG TAT TGG TTG GCT TTC ACG AAG TG-3' [EEHV3,4,7 com]

R2 LGH9990 5'-CTG GCG GCC GCC AGG GGG GAA GGG T GA GC-3' [EEHV3,4,7 com]

L2 LGH9991 5'-CCA CGG CCA CCT CGA CAG AGC TGG-GC3' [EEHV3,4,7 com]

L1 LGH9992 5'-GCC GAC GGC CTG GCC TTC TCC ACG GGT GAC GG-3' [EEHV3,4,7 com]

First round PCR 1A R1-L1 = 430-bp, second round 2A R1-L2 = 335-bp, second round 2B R2-L1 = 380-bp and third round 3AB R2-L2 = 265-bp.

## REFERENCES

1. **Garner MM, Helmick K, Ochsenreiter J, Richman LK, Latimer E, Wise AG, Maes RK, Kiupel M, Nordhausen RW, Zong J-C and Hayward GS.** 2009. Clinico-pathologic features of fatal disease attributed to new variants of endotheliotropic herpesviruses in two Asian elephants (*Elephas maximus*). *Vet Pathol.* **46**:97-104.
2. **Latimer E, Zong J-C, Heaggans SY, Richman LK and Hayward GS.** 2011. Detection and evaluation of novel herpesviruses in routine and pathological samples from Asian and African elephants: identification of two new probosciviruses (EEHV5 and EEHV6) and two new gammaherpesviruses (EGHV3B and EGHV5). *Vet Microbiol.* **147**:28-41.
3. **Richman LK, Montali RJ, Garber RL, Kennedy MA, Lehnhardt J, Hildebrandt T, Schmitt D, Hardy D, Alcendor DJ and Hayward GS.** 1999a. Novel endotheliotropic herpesviruses fatal for Asian and African elephants. *Science.* **283**:1171-1176.
4. **Stanton JJ, Zong J-C, Eng C, Howard L, Flanagan J, Stevens S, Schmitt D, Wiedner E, Graham D, Junge R, Weber MA, Fischer M, Mejia A, Tan J, Latimer E, Herron A, Hayward GS and Ling PD.** 2013. Kinetics of viral loads and genotypic analysis of elephant endotheliotropic herpesvirus-1 infection in captive Asian elephants (*Elephas maximus*). *J Zoo Wildl Med.* **44**:42-54.
5. **Zachariah A, Zong J-C, Long SY, Latimer EM, Heaggans SY, Richman LK and Hayward GS.** 2013. Fatal herpesvirus (EEHV) hemorrhagic disease in wild and orphan Asian elephants in Southern India. *J Wildl Dis.* **49**:383-391.
6. **Richman LK, Zong J-C, Latimer E, Lock J, Fleischer RC, Heaggans SY and Hayward GS.** 2014. Elephant endotheliotropic herpesviruses EEHV1A, EEHV1B, and EEHV2 from cases of hemorrhagic



disease are highly diverged from other mammalian herpesviruses and may form a new subfamily. *J Virol.* **88**:13523-46.

7. **Zong J-C, Latimer EM, Long SY, Richman LK, Heaggans SY and Hayward GS.** 2014. Comparative genome analysis of four elephant endotheliotropic herpesviruses, EEHV3, EEHV4, EEHV5, and EEHV6, from cases of hemorrhagic disease or viremia. *J. Virol.* **88**:13547-69.
